# Supplementary material for: Ionic porous porphyrin cage as a superior catalyst for photocatalytic oxidization
Source: Royal Society of Chemistry journal article supplement (doi:10.1039/d3cy01575k), 2024-01-01
Supplement: d3cy01575k1.pdf [file d3cy01575k1.pdf]

## Supporting Information

# Ionic Porous Porphyrin Cage as a Superior Catalyst for Photocatalytic Oxidization

Cheng Li <sup>a</sup>, Jing-Wang Cui <sup>a</sup>, Jun-Hao Zhou <sup>a</sup>, Yanqing Xu<sup>\*a</sup> and Jian-Ke Sun<sup>\*a, b</sup>

*<sup>a</sup>MOE Key Laboratory of Cluster Science, Beijing Key Laboratory of Photoelectronic/Electrophotonic Conversion Materials, School of Chemistry and Chemical Engineering, Beijing Institute of Technology, Beijing 102488, P. R. China*

*<sup>b</sup>Fujian Institute of Research on the Structure of Matter, Chinese Academy of Science, Fuzhou, Fujian 350002, P. R. China*

*Email: jiankesun@bit.edu.cn*

### Computational Details

DFT calculations were performed using the Gaussian 09 software package.<sup>[1]</sup> The model structure was extracted from the crystallographic data of **TPPCage•8PF<sub>6</sub>** or **TPPCage•8I** in CIF format, including one porphyrin unit, one pyridinium unit, and one corresponding counterion. The model structure was then optimized, and the distributions and energy levels of the involved molecular orbitals were evaluated at the PBE0/def2tzvp level of theory.<sup>[2]</sup> The SMD was chosen to mimic the solvent (water) effect in all calculations.<sup>[3]</sup> Dispersion energies between two fragments are given from Grimme's D3 correction.<sup>[4]</sup> Molecular orbital was implemented in Multiwfn,<sup>[5]</sup> and visualized with VMD.<sup>[6]</sup> Electron density distribution (EDD) of **TPPCage•8PF<sub>6</sub>** or **TPPCage•8I** structure was analyzed with Multiwfn and visualized by VMD.

**Titration of Iodine Ion.** **TPPCage•8I** (10.00 mg, 0.00336 mmol) was dissolved in 2.0 mL of DMF. Then, the AgNO<sub>3</sub> solution (0.250 mmol/mL) was added dropwise to the above solution, with continuous stirring. Following the reaction, the mixture underwent centrifugation, and the resulting product, AgI, was obtained after vacuum drying. By performing calculations, it can be deduced that all iodide ions have undergone exchange, leading to the formation of AgI. The yield of AgI was determined to be 6.340 mg.

**Synthesis of TPPCage•8Cl.** **TPPCage•8PF<sub>6</sub>** (40.00 mg, 0.0129 mmol) was dissolved in 20.0 mL of acetonitrile, while KCl (38.32 mg, 0.514 mmol) was dissolved in 2.0 mL of H<sub>2</sub>O. The aqueous solution of KCl was added slowly to the acetonitrile solution containing **TPPCage•8PF<sub>6</sub>**. The mixture was stirred for 12 h. Following the completion of the reaction, **TPPCage•8Cl** was collected after centrifugation and subsequently subjected to vacuum drying.

<sup>1</sup>H NMR (400MHz, (CD<sub>3</sub>)<sub>2</sub>SO): δ =9.73 (d, 16H), 8.80 (s, 16H), 8.77 (d, 16H), 8.26 (m, 8H), 8.21-8.18 (m, 16H), 7.94 (t, 8H), 6.47 (s, 16H), -3.31 (s, 4H)

**Titration of Chloride Ion.** **TPPCage•8Cl** (10.00 mg, 0.00447 mmol) was dissolved

in 2.0 mL of DMF. Then, the AgNO<sub>3</sub> solution (0.250 mmol/mL) was added dropwise to the above solution, with continuous stirring. Following the reaction, the mixture underwent centrifugation, and the resulting product, AgCl, was obtained after vacuum drying. By performing calculations, it can be deduced that all chloride ions have undergone exchange, leading to the formation of AgCl. The yield of AgCl was determined to be 5.210 mg.

**Synthesis of TPPCage•4PF<sub>6</sub>•4I.** TPPCage•8PF<sub>6</sub> (10.00 mg, 0.00323mmol) was dissolved in 3 mL of acetonitrile, while KI (2.13 mg, 0.0129 mmol) was dissolved in 0.3 mL of H<sub>2</sub>O. The aqueous solution of KI was added slowly to the acetonitrile solution containing TPPCage•8PF<sub>6</sub>. The mixture was stirred for 12 h. Following the completion of the reaction, TPPCage•4PF<sub>6</sub>•4I was collected after centrifugation and subsequently subjected to vacuum drying.

<sup>1</sup>H NMR (400MHz, (CD<sub>3</sub>)<sub>2</sub>SO): δ =9.39 (d, 16H), 8.80 (s, 16H), 8.42 (d, 16H), 8.32 (d, 8H), 8.16 (d, 8H), 8.06 (s, 8H), 7.97 (t, 8H), 6.25 (s, 16H), -3.30 (s, 4H)

**Titration of Iodine Ion.** TPPCage•4PF<sub>6</sub>•4I (10.00 mg, 0.00447 mmol) was dissolved in 2.0 mL of DMF. Then, the AgNO<sub>3</sub> solution (0.250 mmol/mL) was added dropwise to the above solution, with continuous stirring. Following the reaction, the mixture underwent centrifugation, and the resulting product, AgI, was obtained after vacuum drying. By performing calculations, it can be deduced that four PF<sub>6</sub><sup>-</sup> ions have undergone exchange, leading to the formation of AgI. The yield of AgI was determined to be 3.140 mg.

**Synthesis of TPPCage•8SDS.** TPPCage•8I (20.00 mg, 0.00672 mmol) was dissolved in 10.0 mL of DMF, while sodium dodecyl sulfate (38.76 mg, 0.1344 mmol) was dissolved in 2.0 mL of H<sub>2</sub>O. The aqueous solution of sodium dodecyl sulfate was added slowly to the DMF solution containing TPPCage•8I. The mixture was stirred for 12 h. Following the completion of the reaction, TPPCage•8SDS was collected after centrifugation and subsequently subjected to vacuum drying.

$^1\text{H}$  NMR (400MHz,  $(\text{CD}_3)_2\text{SO}$ ):  $\delta$  = 9.37 (d, 16H), 8.80 (s, 16H), 8.41 (d, 16H), 8.34 (d, 8H), 8.19 (d, 8H), 8.06 (s, 8H), 7.98 (t, 8H), 6.24 (s, 16H), 1.33-0.67 (m, 204H), -3.29 (s, 4H)

**Recycle of TPPCage•8I.** TPPCage•8SDS (20.00 mg, 0.0049 mmol) was dissolved in 10.0 mL of DMF, while KI (16.29 mg, 0.098 mmol) was dissolved in 1.0 mL of  $\text{H}_2\text{O}$ . The aqueous solution of KI was added slowly to the DMF solution containing TPPCage•8SDS. The mixture was stirred for 12 h. Following the completion of the reaction, TPPCage•8I was collected after centrifugation and subsequently subjected to vacuum drying.

$^1\text{H}$  NMR (400MHz,  $(\text{CD}_3)_2\text{SO}$ ):  $\delta$  = 9.43 (d, 16H), 8.80 (s, 16H), 8.47 (d, 16H), 8.33 (d, 8H), 8.17 (d, 8H), 8.08 (s, 8H), 7.97 (t, 8H), 6.29 (s, 16H), -3.30 (s, 4H)

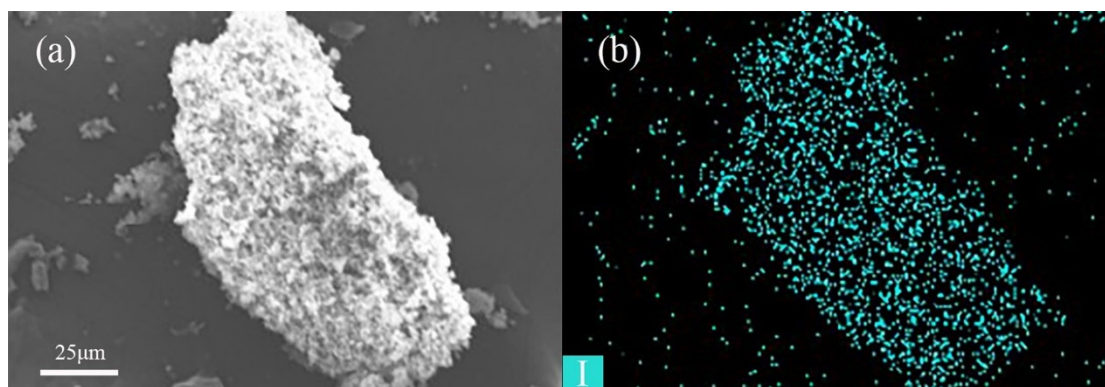

**Figure S1.** (a, b) EDS spectra of TPPCage•8I.

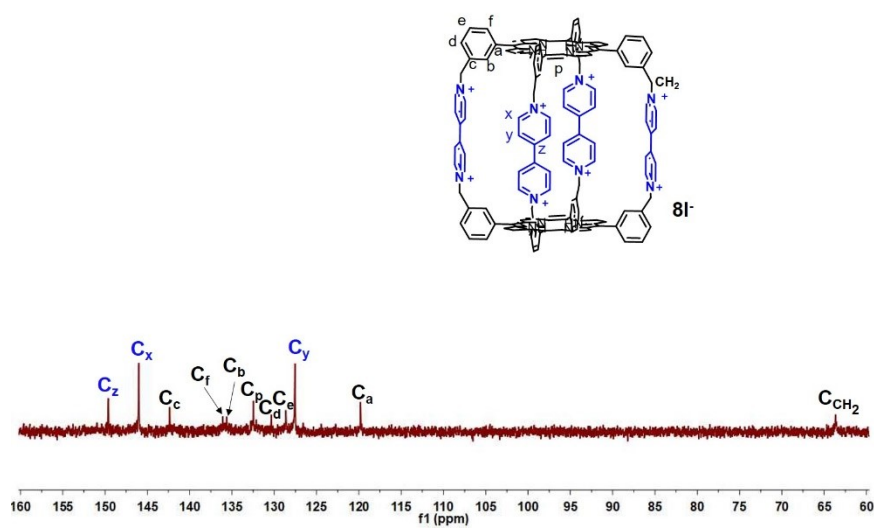

**Figure S2.**  $^{13}\text{C}$  NMR spectra of TPPCage•8I.

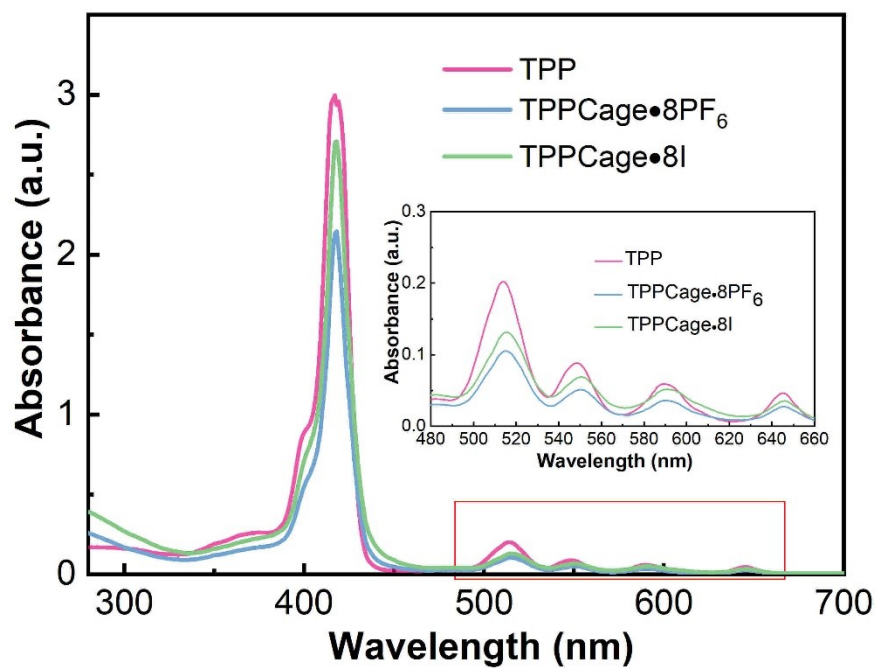

**Figure S3.** UV-vis spectra of TPP, TPPCage•8PF<sub>6</sub> and TPPCage•8I.

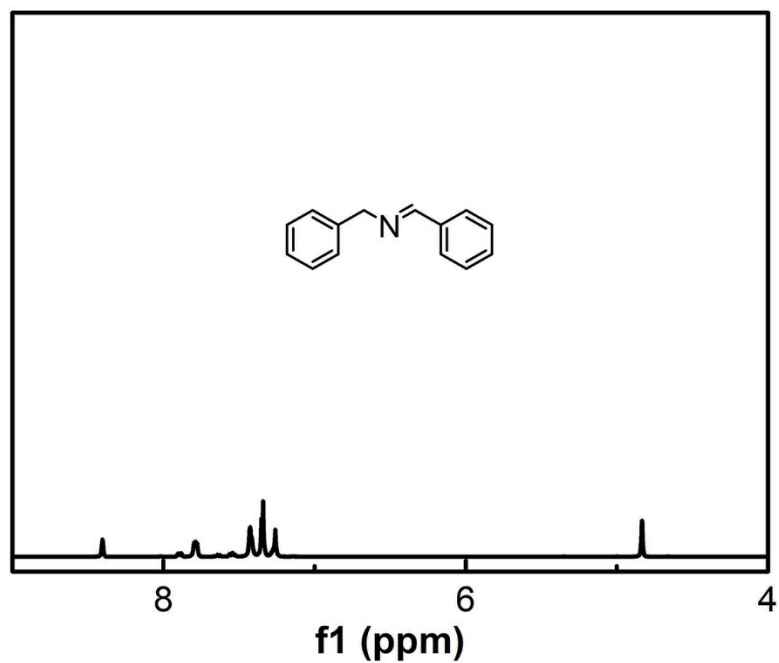

**Figure S4.** <sup>1</sup>H NMR spectra of N-benzylidenezylamine.

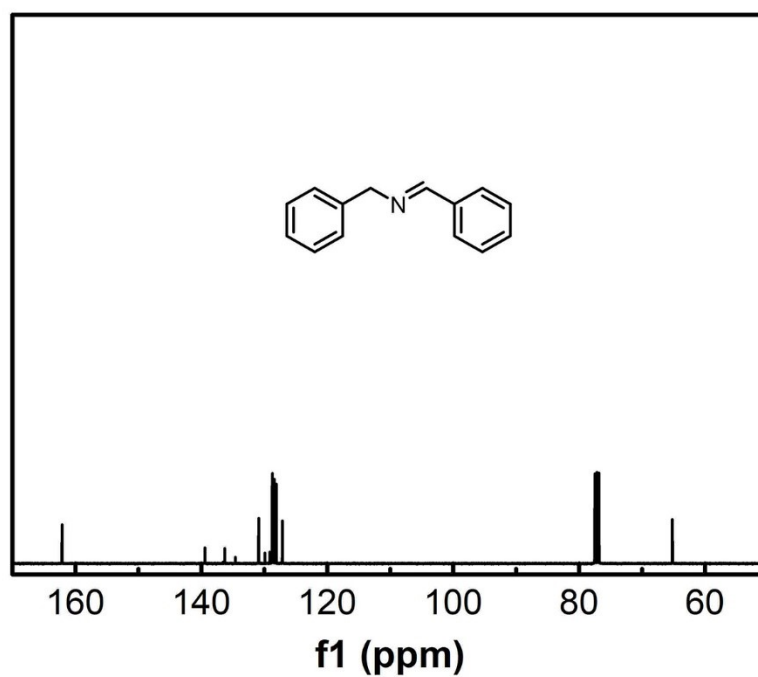

**Figure S5.**  $^{13}\text{C}$  NMR spectra of N-benzylidenezylamine.

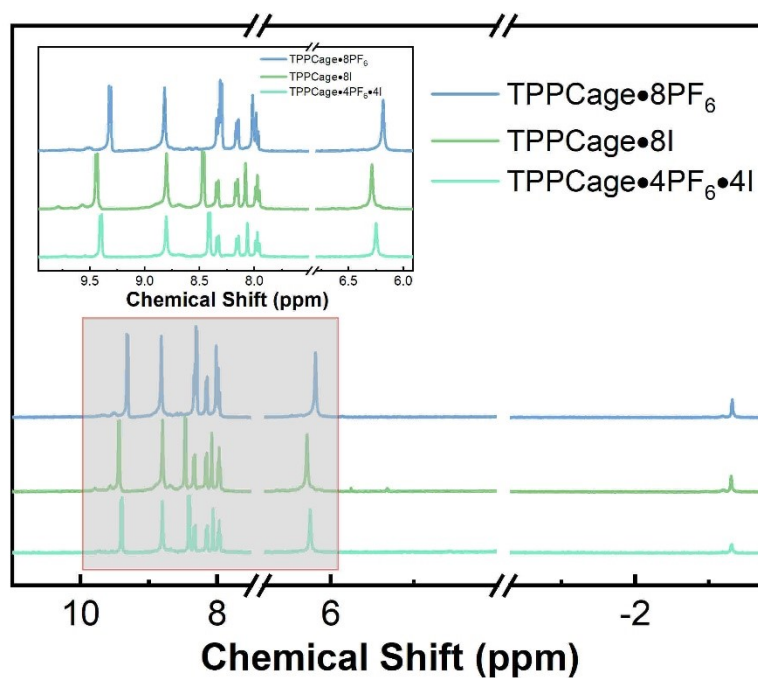

**Figure S6.**  $^1\text{H}$  NMR spectra of TPPCage•8PF<sub>6</sub>, TPPCage•8I and TPPCage•4PF<sub>6</sub>•4I.

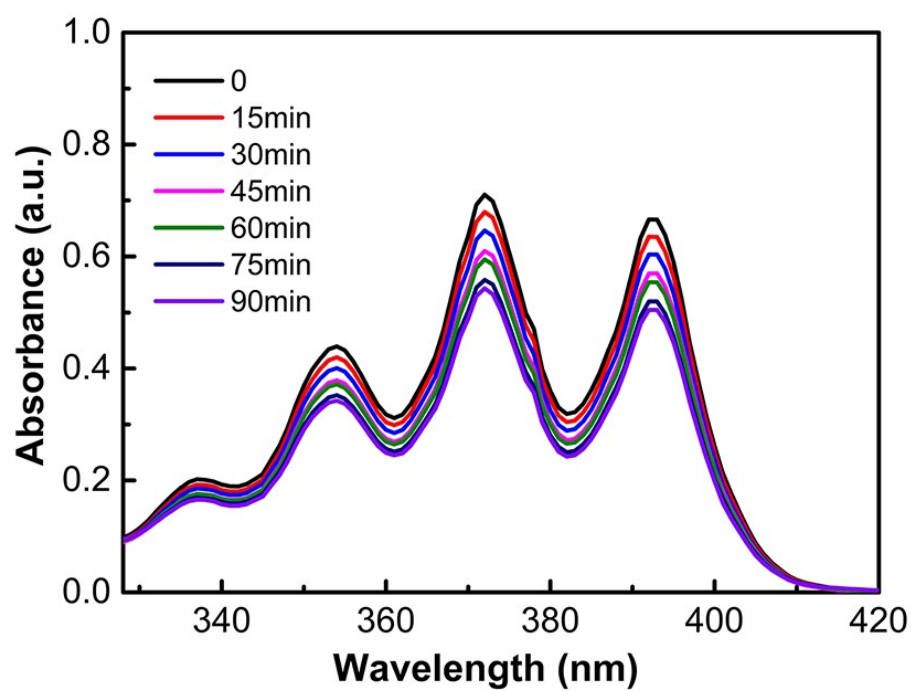

**Figure S7.** Photo-bleach experiments based on the oxidation of DPA in ethyl acetate upon irradiation at  $\lambda > 420$  nm.

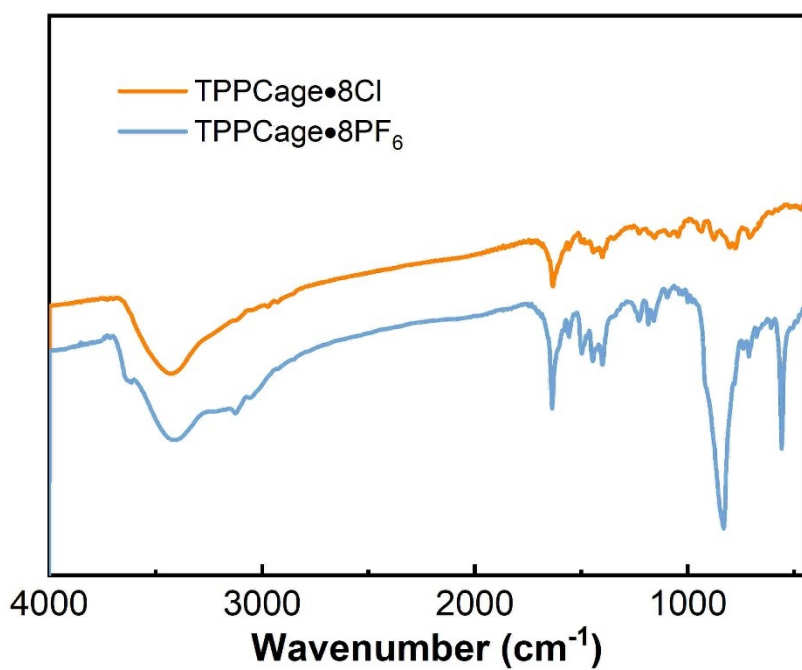

**Figure S8.** FT-IR spectra of TPPCage•8PF<sub>6</sub> and TPPCage•8Cl.

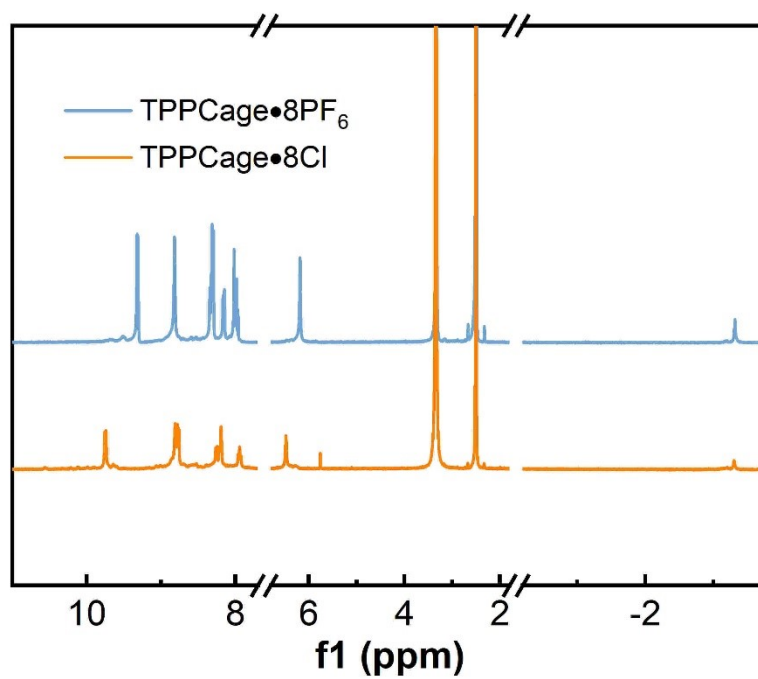

**Figure S9.** <sup>1</sup>H NMR spectra of TPPCage•8PF<sub>6</sub> and TPPCage•8Cl.

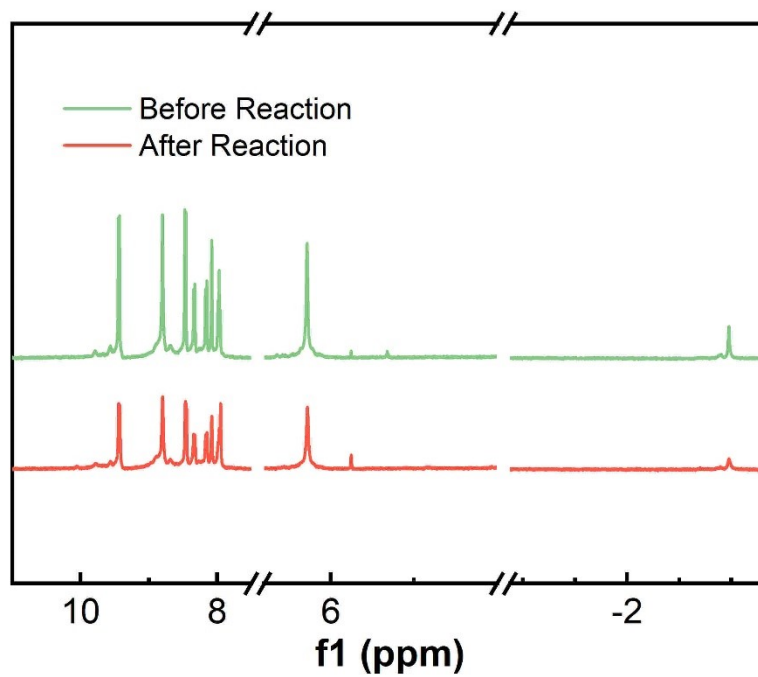

**Figure S10.** <sup>1</sup>H NMR spectra of TPPCage•8I before and after five repeating cycles.

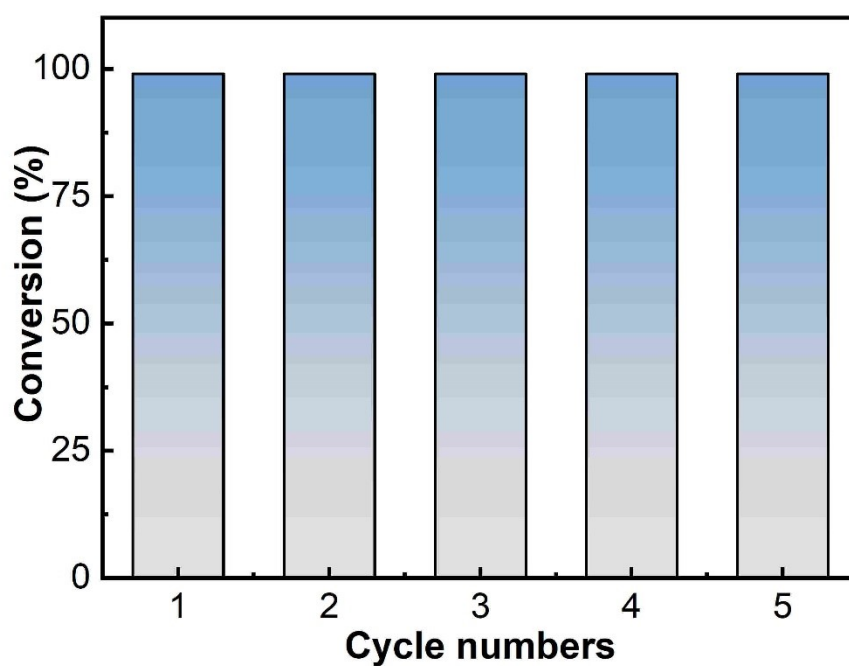

**Figure S11.** The conversion of photocatalytic oxidative coupling of benzylamines with TPPCage•8I under blue LED light in five repeating cycles.

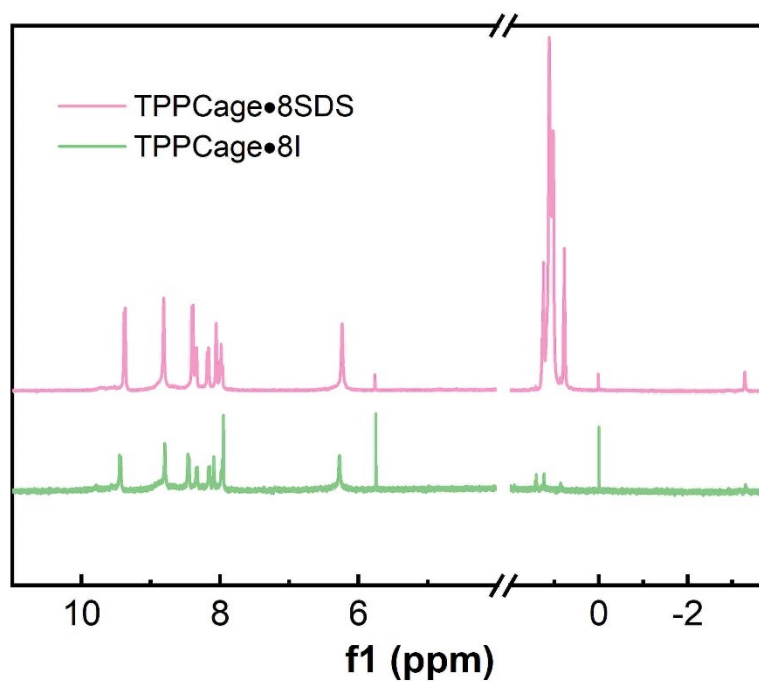

**Figure S12.** <sup>1</sup>H NMR spectra of TPPCage•8SDS and TPPCage•8I.

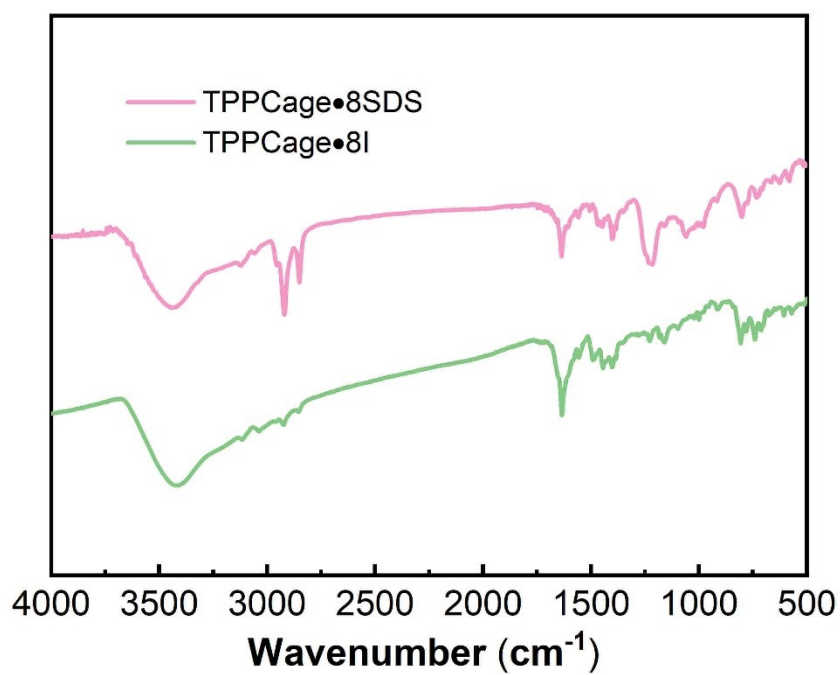

**Figure S13.** FT-IR spectra of TPPCage•8SDS and TPPCage•8I.

**Table S1.** Comparison of the catalytic performance of various photocatalysts in amines oxidation in visible light.

| Entry | Photocatalysts                       | Reaction conditions <sup>a</sup>                           | Conversion (%) | Selectively (%) | TOF (h <sup>-1</sup> ) <sup>b</sup> | Ref.             |
|-------|--------------------------------------|------------------------------------------------------------|----------------|-----------------|-------------------------------------|------------------|
| 1     | [Au <sub>25</sub> ]/TiO <sub>2</sub> | 0.2mmol[B]+<br>10mg[C]<br>+CH <sub>3</sub> CN              | 98             | 99              | 878                                 | 7                |
| 2     | In-MOF                               | 0.2mmol[B]+<br>4mg[C]<br>+DMSO                             | 99             | 99              | 16.7                                | 8                |
| 3     | PTC-1(2H)                            | 0.1mmol[B]+<br>0.1μmol[C]<br>+CH <sub>3</sub> CN           | 99             | 99              | 1320                                | 9                |
| 4     | Por-BC-COF                           | 0.2mmol[B]+<br>10mg[C]<br>+ CH <sub>3</sub> CN             | 99             | 97              | 22.5                                | 10               |
| 5     | CoP@POC                              | 1mmol[B]+3<br>mg[C]+<br>CH <sub>3</sub> CN                 | 99             | 99              | 1389                                | 11               |
| 6     | TPPCage•8I                           | <b>1mmol[B]+3<br/>mg[C]+<br/>CH<sub>3</sub>CN/DM<br/>F</b> | <b>99</b>      | <b>99</b>       | <b>1980</b>                         | <b>This work</b> |

<sup>a</sup>[B] is short for benzylamine, [C] is short for photocatalyst. <sup>b</sup>TOF is calculated based on mole of amine converted per mole of catalyst per hour.

**Table S2.** Comparison of the catalytic performance of various photocatalysts in amines oxidation in visible light.

| Entry | Photocatalysts | Reaction conditions <sup>a</sup>                           | Conversion (%) | Selectively (%) | TOF (mmol. g <sup>-1</sup> .h <sup>-1</sup> ) <sup>b</sup> | Ref.             |
|-------|----------------|------------------------------------------------------------|----------------|-----------------|------------------------------------------------------------|------------------|
| 1     | Cd(dcbpy)      | 0.48mmol[B]<br>+10mg[C]<br>+DMF                            | 41.8           | 99              | 5.016                                                      | 12               |
| 2     | CS@MF-3        | 0.2mmol[B]+<br>10mg[C]<br>+CH <sub>3</sub> CN              | 99             | 95              | 19                                                         | 13               |
| 3     | CoSAS@CD       | 1mmol[B]+3<br>mg[C]<br>+CH <sub>3</sub> CN                 | 83             | 99              | 23.1                                                       | 14               |
| 4     | Pc-Ludox-8     | 5mmol[B]+20<br>mg[C]+<br>solvent free                      | 90.9           | 99.1            | 45.45                                                      | 15               |
| 5     | <i>o</i> -COF  | 0.1mmol[B]+<br>2mg[C]+<br>CH <sub>3</sub> CN               | 99             | 99              | 49.5                                                       | 16               |
| 6     | TPPCage•8I     | <b>1mmol[B]+3<br/>mg[C]+<br/>CH<sub>3</sub>CN/DM<br/>F</b> | <b>99</b>      | <b>99</b>       | <b>666.7</b>                                               | <b>This work</b> |

<sup>a</sup>[B] is short for benzylamine, [C] is short for photocatalyst. <sup>b</sup>TOF is calculated based on mole of amine converted per gram of catalyst per hour.

**Table S3.** Photocatalytic oxidation coupling of benzylamines with TPPCage•8I under different reaction conditions<sup>a</sup>.

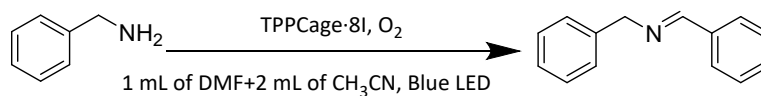

| Entry          | Photocatalyst     | Reaction condition         | Time (h) | Conversion (%) |
|----------------|-------------------|----------------------------|----------|----------------|
| 1              | <b>TPPCage•8I</b> | Standard                   | 0.5      | >99            |
| 2              | <b>TPPCage•8I</b> | With 1 mg photocatalyst    | 0.5      | 85.5           |
| 3              | <b>TPPCage•8I</b> | With 5 mg photocatalyst    | 0.5      | >99            |
| 4              | <b>TPPCage•8I</b> | With benzylamine 0.5 mmol  | 0.33     | >99            |
| 5              | <b>TPPCage•8I</b> | With benzylamine 2.0 mmol  | 0.5      | 35.2           |
| 6              | <b>TPPCage•8I</b> | In 3 mL DMF                | 0.5      | 60.0           |
| 7              | <b>TPPCage•8I</b> | In 3 mL CH <sub>3</sub> CN | 0.5      | 91.12          |
| 8 <sup>b</sup> | <b>TPPCage•8I</b> | In Air                     | 1.0      | 63.52          |
| 9 <sup>c</sup> | <b>TPPCage•8I</b> | In N <sub>2</sub>          | 1.0      | —              |
| 10             | <b>TPPCage•8I</b> | Under 5 W LED light        | 0.5      | 77.11          |

<sup>a</sup>Standard Reaction conditions: photocatalyst (3 mg), substrate (1 mmol), 1 mL of DMF and 2 mL of CH<sub>3</sub>CN, O<sub>2</sub> balloon, blue LED light (10 W). <sup>b</sup>Reaction carried out in Air condition. <sup>c</sup>Reaction carried out in N<sub>2</sub> condition.

## References

- 1 A. Frisch, gaussian 09W Reference, Wallingford, USA, 2009, **470**, 25p.
- 2 C. Adamo, V. Barone, *J. Chem. Phys.*, 1999, **110**, 6158-6170.
- 3 A. V. Marenich, C. J. Cramer, D. G. Truhlar, *J. Phys. Chem. B*, 2009, **113**, 4538-4543.
- 4 S. Grimme, C. Bannwarth, P. Shushkov, *J. Chem. Theory. Comput.*, 2017, **13**, 1989-2009.
- 5 T. Lu, F. Chen, *J. Comput. Chem.*, 2012, **33**, 580-592.
- 6 W. Humphrey, A. Dalke, K. Schulten, *J. Mol. Graph.*, 1996, **14**, 33-38.
- 7 H. Chen, C. Liu, M. Wang, C. Zhang, N. Luo, Y. Wang, H. Abroshan, G. Li, F. Wang, *ACS Catal.*, 2017, **7**, 3632-3638.
- 8 H. Wei, Z. Guo, X. Liang, P. Chen, H. Liu, H. Xing, *ACS Appl. Mater. Inter.*, 2019, **11**, 3016-3023.
- 9 C. Liu, K. Liu, C. Wang, H. Liu, H. Wang, H. Su, X. Li, B. Chen, J. Jiang, *Nat. Commun.*, 2020, **11**, 1047.
- 10 H. He, X. Fang, D. Zhai, W. Zhou, Y. Li, W. Zhao, C. Liu, Z. Li, W. Deng, *Chem. Eur. J.*, 2021, **27**, 14390-14395.
- 11 F. Zhang, J. Ma, Y. Tan, G. Yu, H. Qin, L. Zheng, H. Liu, R. Li, *ACS Catal.*, 2022, **12**, 5827-5833.
- 12 J. Shi, J. Zhang, T. Liang, D. Tan, X. Tan, Q. Wan, X. Cheng, B. Zhang, B. Han, L. Liu, F. Zhang, G. Chen, *ACS Appl. Mater. Inter.*, 2019, **11**, 30953-30958.
- 13 K. Gao, H. Li, Q. Meng, J. Wu, H. Hou, *ACS Appl. Mater. Inter.*, 2021, **13**, 2779-2787.
- 14 Q. Wang, J. Li, X. Tu, H. Liu, M. Shu, R. Si, C.T.J. Ferguson, K.A.I. Zhang, R. Li, *Chem. Mater.*, 2019, **32**, 734-743.
- 15 B. Chen, L. Wang, W. Dai, S. Shang, Y. Lv, S. Gao, *ACS Catal.*, 2015, **5**, 2788-2794.
- 16 N. Sun, Y. Jin, H. Wang, B. Yu, R. Wang, H. Wu, W. Zhou, J. Jiang, *Chem. Mater.*, 2022, **34**, 1956-1964.
